# Supplementary material
Source: PubMed Central journal article supplement (PMC8570536)
Supplement: NIHMS1743905-supplement-1743905_Sup_info_.pdf [file NIHMS1743905-supplement-1743905_Sup_info_.pdf]

---

**Supplementary information**

---

**Altered chromatin states drive cryptic transcription in aging mammalian stem cells**

---

In the format provided by the authors and unedited

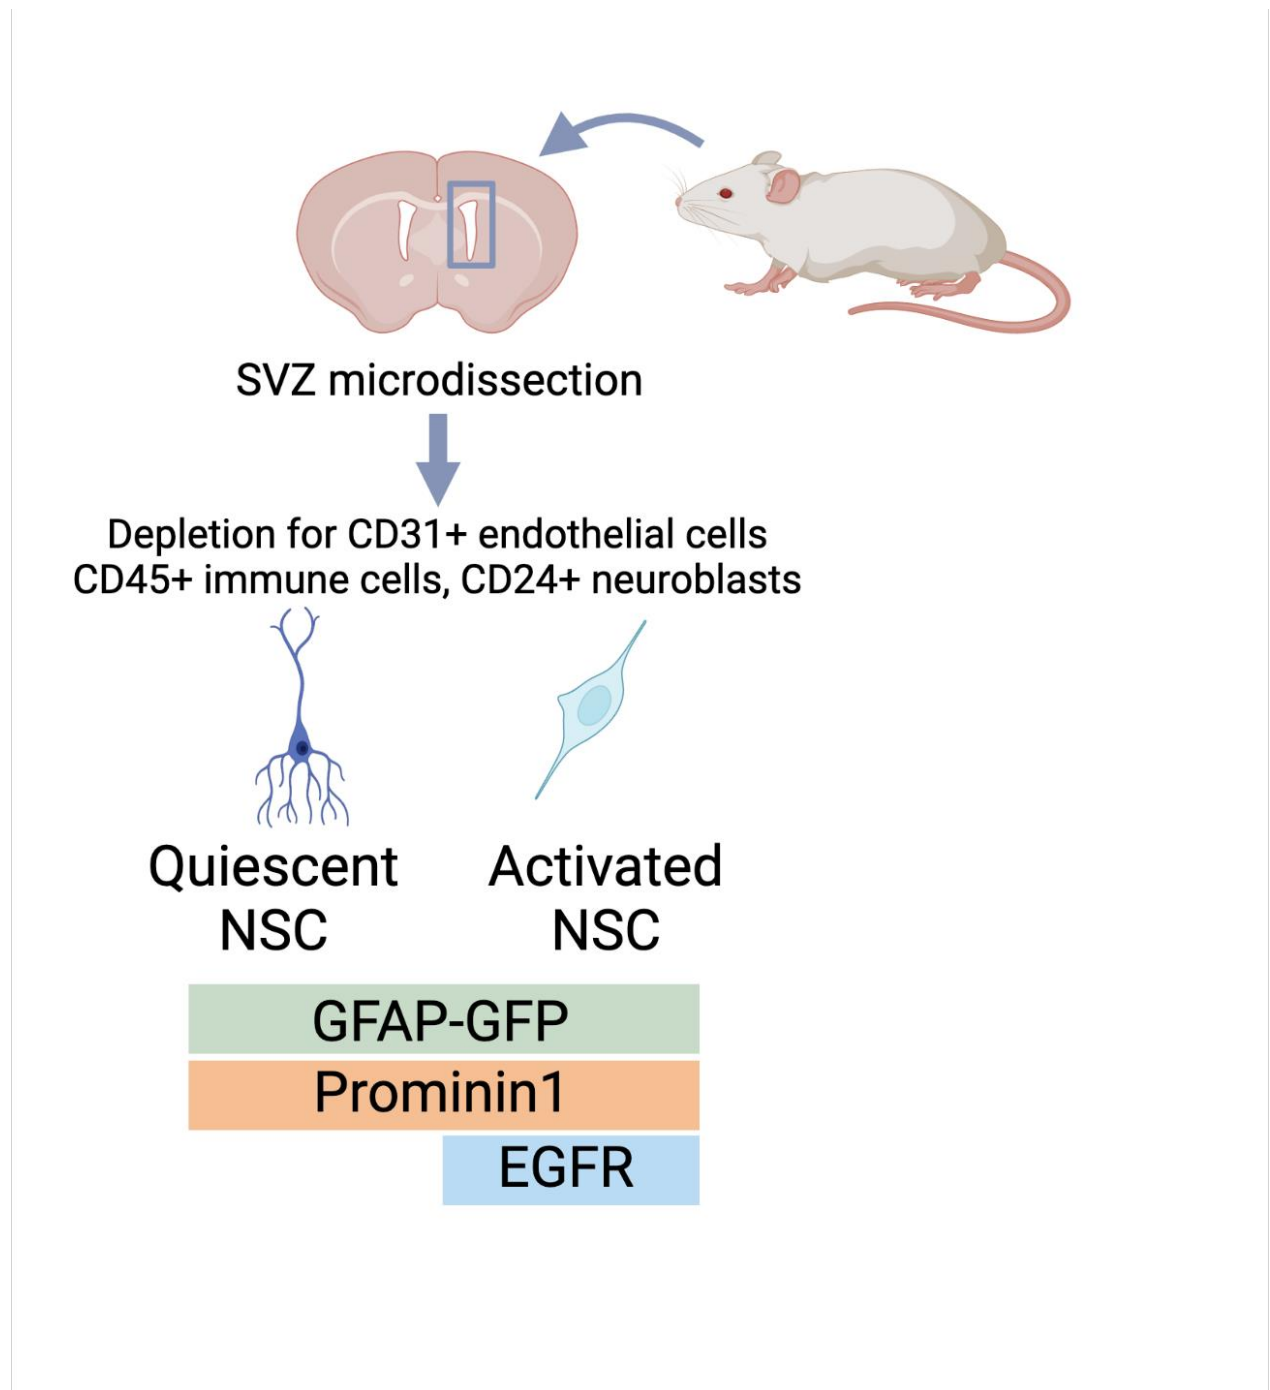

**Supplementary Figure 1. Schematic of FACS scheme for isolating activated and quiescent neural stem cells from hGFAP-GFP transgenic mice (FVB/N background).** The subventricular zone (SVZ) was microdissected from the mouse brain and cells were disassociated with papain. Endothelial cells (CD31+), immune cells (CD45+), and neuroblasts (CD24+) were eliminated. NSCs (GFP+Prominin1+) were isolated and separated into qNSC (GFP+Prominin1+EGFR-) and aNSC (GFP+Prominin1+EGFR+) populations.
